# Supplementary material for: Exploring the Effects of Multidimensional Context on Human Performance in Personal Bookmark Management
Source: Hindawi journal article supplement (doi:10.1155/2013/932586), 2013-01-01
Supplement: f1 [file 932586.f1.pdf]

## Appendix A – 2D/3D Questionnaire

Name: \_\_\_\_\_ Age: \_\_\_\_\_

Gender: ☐ Female / ☐ Male

Task list:

1. Create/delete a new pot.
2. Name the pot.
3. Change the colour of the pot.
4. Change the texture of the pot.
5. Create a new leaf for any two of the following 12 URL's.

### Work

|                          |                                                                                                                                                                                                   |
|--------------------------|---------------------------------------------------------------------------------------------------------------------------------------------------------------------------------------------------|
| Computing and IT         | <a href="http://www.infoworld.com/">http://www.infoworld.com/</a>                                                                                                                                 |
| Job Search               | <a href="http://www.careerbuilder.com/">http://www.careerbuilder.com/</a>                                                                                                                         |
| Annual Leave             | <a href="http://www.opm.gov/oca/leave/html/annual.asp">http://www.opm.gov/oca/leave/html/annual.asp</a>                                                                                           |
| Meetings & Presentations | <a href="http://office.microsoft.com/en-us/templates/company-meeting-presentation-TC006256164.aspx">http://office.microsoft.com/en-us/templates/company-meeting-presentation-TC006256164.aspx</a> |
| Office Equipment         | <a href="http://www.eofficedirect.com/">http://www.eofficedirect.com/</a>                                                                                                                         |
| Pension                  | <a href="http://www.pension.org.tw/tc/index.asp">http://www.pension.org.tw/tc/index.asp</a>                                                                                                       |
| Promotion                | <a href="http://theadventurouswriter.com/blog/how-to-get-a-job-promotion-ways-to-work-your-way-up/">http://theadventurouswriter.com/blog/how-to-get-a-job-promotion-ways-to-work-your-way-up/</a> |
| Research                 | <a href="http://en.wikipedia.org/wiki/Research">http://en.wikipedia.org/wiki/Research</a>                                                                                                         |
| Retirement               | <a href="http://www.direct.gov.uk/en/Pensionsandretirementplanning/PlanningForRetirement/index.htm">http://www.direct.gov.uk/en/Pensionsandretirementplanning/PlanningForRetirement/index.htm</a> |
| Salary & Allowances      | <a href="http://www.sat.wa.gov.au/Pages/Default.aspx">http://www.sat.wa.gov.au/Pages/Default.aspx</a>                                                                                             |
| Tax                      | <a href="http://www.reachtoteachrecruiting.com/taiwan-tax-rules.html">http://www.reachtoteachrecruiting.com/taiwan-tax-rules.html</a>                                                             |
| Training & Study         | <a href="http://www.businessballs.com/traindev.htm">http://www.businessballs.com/traindev.htm</a>                                                                                                 |

6. Repeat (1-5) above for any two of the following Social, Travel, or Health folders.

|               |
|---------------|
| <b>Social</b> |
|---------------|

|                           |                                                                                                                                                                                               |
|---------------------------|-----------------------------------------------------------------------------------------------------------------------------------------------------------------------------------------------|
| Arts & Entertainment      | <a href="http://www.cbc.ca/news/arts/">http://www.cbc.ca/news/arts/</a>                                                                                                                       |
| Education                 | <a href="http://www.direct.gov.uk/en/EducationAndLearning/UniversityAndHigherEducation/index.htm">http://www.direct.gov.uk/en/EducationAndLearning/UniversityAndHigherEducation/index.htm</a> |
| Family & Friends          | <a href="http://www.family-friends.org.uk/">http://www.family-friends.org.uk/</a>                                                                                                             |
| Fashion & Clothes         | <a href="http://www.vogue.com">http://www.vogue.com</a>                                                                                                                                       |
| Finance & Business        | <a href="http://www.ft.com">http://www.ft.com</a>                                                                                                                                             |
| Food & Cooking            | <a href="http://www.jamieoliver.com/">http://www.jamieoliver.com/</a>                                                                                                                         |
| History & Religion        | <a href="http://www.bbc.co.uk/religion/religions/taoism/">http://www.bbc.co.uk/religion/religions/taoism/</a>                                                                                 |
| Hobbies & Sport           | <a href="http://www.manutd.com/Splash-Page.aspx">http://www.manutd.com/Splash-Page.aspx</a>                                                                                                   |
| Home & Garden             | <a href="http://gardening.about.com/">http://gardening.about.com/</a>                                                                                                                         |
| Natural World/Environment | <a href="http://webecoist.com/2009/01/18/nature-phenomena-wonders-natural-world/">http://webecoist.com/2009/01/18/nature-phenomena-wonders-natural-world/</a>                                 |
| News/Politics             | <a href="http://www.whitehouse.gov/administration/president-obama">http://www.whitehouse.gov/administration/president-obama</a>                                                               |
| Science & Technology      | <a href="http://www.sciencemuseum.org.uk/">http://www.sciencemuseum.org.uk/</a>                                                                                                               |

|               |
|---------------|
| <b>Travel</b> |
|---------------|

|                     |                                                                                                                                                                                                                   |
|---------------------|-------------------------------------------------------------------------------------------------------------------------------------------------------------------------------------------------------------------|
| Car                 | <a href="http://www.hertz.com/">http://www.hertz.com/</a>                                                                                                                                                         |
| Country Information | <a href="http://www.countryreports.org/">http://www.countryreports.org/</a>                                                                                                                                       |
| Currency            | <a href="http://www.xe.com/ucc">http://www.xe.com/ucc</a>                                                                                                                                                         |
| Flights             | <a href="http://www.lastminute.com/">http://www.lastminute.com/</a>                                                                                                                                               |
| Holidays            | <a href="http://www.booking.com">http://www.booking.com</a>                                                                                                                                                       |
| Insurance           | <a href="http://www.worldnomads.com/">http://www.worldnomads.com/</a>                                                                                                                                             |
| Luggage             | <a href="http://www.walmart.com/cp/luggage/444253">http://www.walmart.com/cp/luggage/444253</a>                                                                                                                   |
| Maps/Directions     | <a href="http://www.nationsonline.org/oneworld/map/google_map_taiwan.htm">http://www.nationsonline.org/oneworld/map/google_map_taiwan.htm</a>                                                                     |
| Passport/Visa       | <a href="http://passport.gov.in/">http://passport.gov.in/</a>                                                                                                                                                     |
| Traffic Reports     | <a href="http://www.traffic.com/">http://www.traffic.com/</a>                                                                                                                                                     |
| Vaccinations        | <a href="http://health.nytimes.com/health/guides/specialtopic/immunizations-general-overview/overview.html">http://health.nytimes.com/health/guides/specialtopic/immunizations-general-overview/overview.html</a> |
| Weather             | <a href="http://weather.edition.cnn.com/weather/intl/forecast.jsp">http://weather.edition.cnn.com/weather/intl/forecast.jsp</a>                                                                                   |

|               |
|---------------|
| <b>Health</b> |
|---------------|

|                             |                                                                                                                                                                             |
|-----------------------------|-----------------------------------------------------------------------------------------------------------------------------------------------------------------------------|
| Alcohol & Drugs             | <a href="http://www.alcohol.gov.au/">http://www.alcohol.gov.au/</a>                                                                                                         |
| Arthritis                   | <a href="http://www.arthritis.com/">http://www.arthritis.com/</a>                                                                                                           |
| Baby/Child                  | <a href="http://health.howstuffworks.com/pregnancy-and-parenting/baby-health">http://health.howstuffworks.com/pregnancy-and-parenting/baby-health</a>                       |
| Blood Pressure              | <a href="http://www.mayoclinic.com/health/high-blood-pressure/DS00100">http://www.mayoclinic.com/health/high-blood-pressure/DS00100</a>                                     |
| Cancer                      | <a href="http://supportus.cancerresearchuk.org/donate/?gclid=CN73ksm-1KwCFYYOfAodMyEmrQ">http://supportus.cancerresearchuk.org/donate/?gclid=CN73ksm-1KwCFYYOfAodMyEmrQ</a> |
| Coughs, Colds and Flu       | <a href="http://www.flu.gov/">http://www.flu.gov/</a>                                                                                                                       |
| Diet/Weight/Fitness         | <a href="http://www.lighterlife.com/?gclid=CI-g2OC21KwCFQMPfAodqnf6g">http://www.lighterlife.com/?gclid=CI-g2OC21KwCFQMPfAodqnf6g</a>                                       |
| Diabetes                    | <a href="http://www.diabetes.org/">http://www.diabetes.org/</a>                                                                                                             |
| Heart Disease               | <a href="http://www.mamashealth.com/Heart_stat.asp">http://www.mamashealth.com/Heart_stat.asp</a>                                                                           |
| Hear/Sight/Smell/Taste/Feel | <a href="http://www.webmd.com/eye-health/maintaining-good-eyesight">http://www.webmd.com/eye-health/maintaining-good-eyesight</a>                                           |
| Mental/Depression           | <a href="http://helpguide.org/mental/depression_signs_types_diagnosis_treatment.htm">http://helpguide.org/mental/depression_signs_types_diagnosis_treatment.htm</a>         |
| Sexual/ Family Planning     | <a href="http://www.sexualhealth.com/">http://www.sexualhealth.com/</a>                                                                                                     |

7. Find a particular website from the History tree and time how long this takes.

- Measure the time it takes each user to perform the tests and then grade their performance on task (how well did they do in accomplishing the tasks).
- Ask the users for feedback on what they thought of each version 2D and 3D and also which one they liked best and why?

### General Satisfaction Questionnaire:

*1. The concept of gardening is familiar and the information display is in a natural and logical order.*

2D

|                   |          |         |       |                |
|-------------------|----------|---------|-------|----------------|
| Strongly Disagree | Disagree | Neutral | Agree | Strongly Agree |
|-------------------|----------|---------|-------|----------------|

3D

|                   |          |         |       |                |
|-------------------|----------|---------|-------|----------------|
| Strongly Disagree | Disagree | Neutral | Agree | Strongly Agree |
|-------------------|----------|---------|-------|----------------|

*2. The visual icons and layout fit appropriately to the gardening context and allow users to adapt frequent actions and speed up the interaction?*

|                            |         |       |                |
|----------------------------|---------|-------|----------------|
|                            | 2D      |       |                |
| Strongly Disagree Disagree | Neutral | Agree | Strongly Agree |

|                            |         |       |                |
|----------------------------|---------|-------|----------------|
|                            | 3D      |       |                |
| Strongly Disagree Disagree | Neutral | Agree | Strongly Agree |

*3. The visual icons and layout contain relevant information and the overall design is visually pleasant.*

|                            |         |       |                |
|----------------------------|---------|-------|----------------|
|                            | 2D      |       |                |
| Strongly Disagree Disagree | Neutral | Agree | Strongly Agree |

|                            |         |       |                |
|----------------------------|---------|-------|----------------|
|                            | 3D      |       |                |
| Strongly Disagree Disagree | Neutral | Agree | Strongly Agree |

*4. The pots, plants, and leaves are logical representational equivalents for folders, files and documents?*

|                            |         |       |                |
|----------------------------|---------|-------|----------------|
|                            | 2D      |       |                |
| Strongly Disagree Disagree | Neutral | Agree | Strongly Agree |

|                            |         |       |                |
|----------------------------|---------|-------|----------------|
|                            | 3D      |       |                |
| Strongly Disagree Disagree | Neutral | Agree | Strongly Agree |

*5. It is easy to create/delete a new pot?*

|                            |         |       |                |
|----------------------------|---------|-------|----------------|
|                            | 2D      |       |                |
| Strongly Disagree Disagree | Neutral | Agree | Strongly Agree |

|                            |         |       |                |
|----------------------------|---------|-------|----------------|
|                            | 3D      |       |                |
| Strongly Disagree Disagree | Neutral | Agree | Strongly Agree |

*6. It is easy to name a pot?*

2D

|                   |          |         |       |                |
|-------------------|----------|---------|-------|----------------|
| Strongly Disagree | Disagree | Neutral | Agree | Strongly Agree |
|-------------------|----------|---------|-------|----------------|

3D

|                   |          |         |       |                |
|-------------------|----------|---------|-------|----------------|
| Strongly Disagree | Disagree | Neutral | Agree | Strongly Agree |
|-------------------|----------|---------|-------|----------------|

*7. It is easy to change the colour and texture of the pot?*

2D

|                   |          |         |       |                |
|-------------------|----------|---------|-------|----------------|
| Strongly Disagree | Disagree | Neutral | Agree | Strongly Agree |
|-------------------|----------|---------|-------|----------------|

3D

|                   |          |         |       |                |
|-------------------|----------|---------|-------|----------------|
| Strongly Disagree | Disagree | Neutral | Agree | Strongly Agree |
|-------------------|----------|---------|-------|----------------|

*8. It is easy to add a new leaf?*

2D

|                   |          |         |       |                |
|-------------------|----------|---------|-------|----------------|
| Strongly Disagree | Disagree | Neutral | Agree | Strongly Agree |
|-------------------|----------|---------|-------|----------------|

3D

|                   |          |         |       |                |
|-------------------|----------|---------|-------|----------------|
| Strongly Disagree | Disagree | Neutral | Agree | Strongly Agree |
|-------------------|----------|---------|-------|----------------|

*9. The use of the History tree makes it easy to view your history records?*

2D

|                   |          |         |       |                |
|-------------------|----------|---------|-------|----------------|
| Strongly Disagree | Disagree | Neutral | Agree | Strongly Agree |
|-------------------|----------|---------|-------|----------------|

3D

|                   |          |         |       |                |
|-------------------|----------|---------|-------|----------------|
| Strongly Disagree | Disagree | Neutral | Agree | Strongly Agree |
|-------------------|----------|---------|-------|----------------|

**Post questionnaire follow-up:**

- Which elements did you like most about the interface? Please state why?

- Which elements did you like least about the interface? Please state why?
- If the Web browser based on the Garden Metaphor was made available to you, do you think that you would like to use it? Please state why?
- What would you suggest as changes to the design of the Web browser based on the Garden Metaphor?
- Do you have any other final comments or reactions?
